# Supplementary material for: γδ T cells shape memory-phenotype αβ T cell populations in non-immunized mice
Source: PubMed Central journal article supplement (PMC6592556; doi:10.1371/journal.pone.0218827), 2019-06-25

**S1 Fig. : Effect of in vivo treatment with anti TCR mAbs on splenic T cells in C57BL/6 (wt) mice**

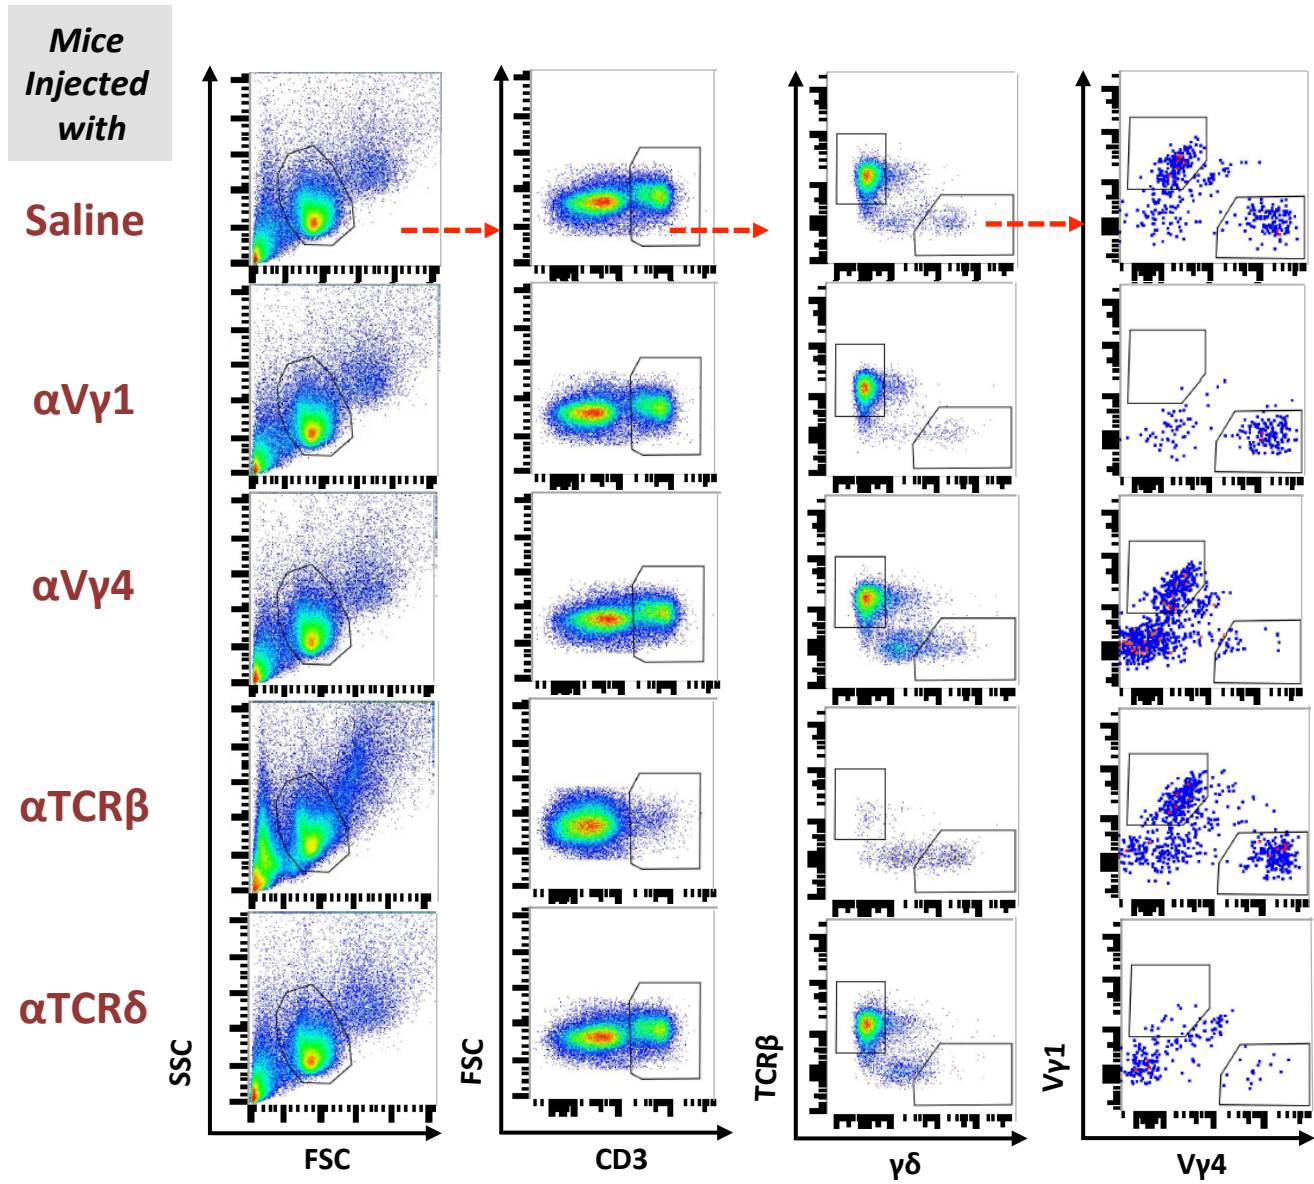

Supplement: pone.0218827.s001.pdf [file pone.0218827.s001.pdf]
