# Supplementary material for: γδ T cells shape memory-phenotype αβ T cell populations in non-immunized mice
Source: PubMed Central journal article supplement (PMC6592556; doi:10.1371/journal.pone.0218827), 2019-06-25
Supplement: pone.0218827.s004.pdf [file pone.0218827.s004.pdf]

## S4 Fig

Relative frequencies of CD4+ and CD8+  $\alpha\beta$  T cells in the spleen of  $\gamma\delta$  T cell-deficient mice

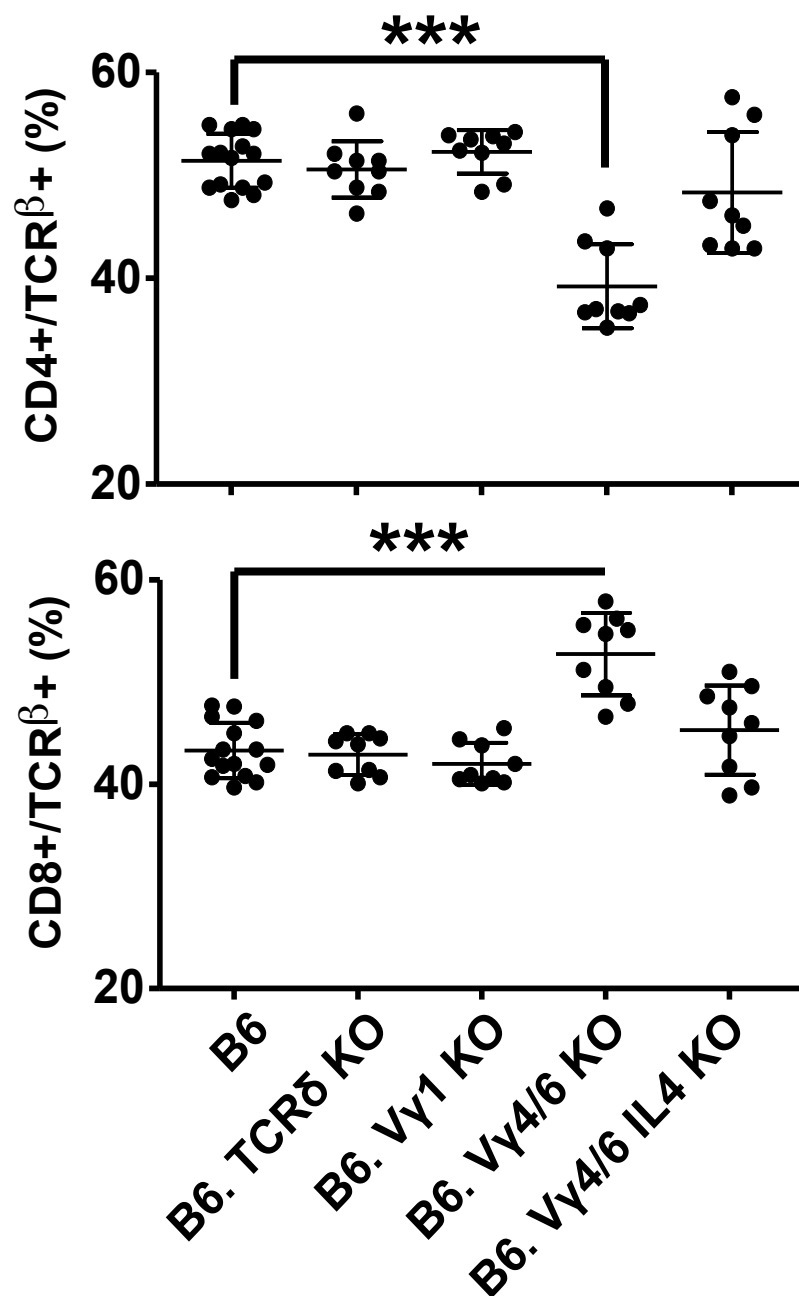

Female and male mice ages 8-12 wks were included in the comparisons shown (same mice as in in Fig 1). \*\*\*p<0.001
