# Supplementary material for: γδ T cells shape memory-phenotype αβ T cell populations in non-immunized mice
Source: PubMed Central journal article supplement (PMC6592556; doi:10.1371/journal.pone.0218827), 2019-06-25

S6 Fig.: Similar splenic lymphocyte numbers in female and male  $\gamma\delta$  T cell deficient mice

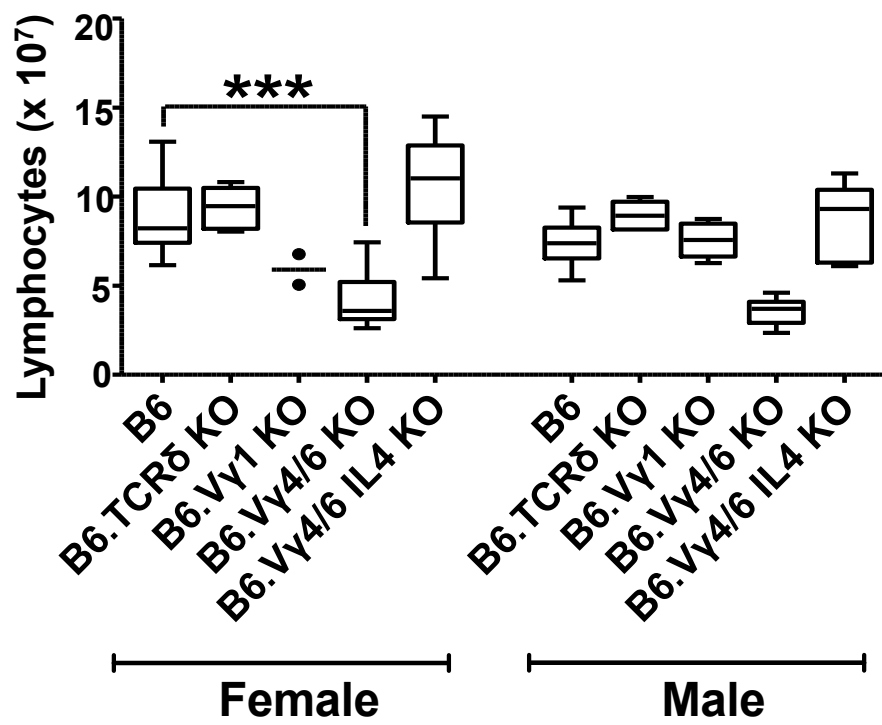

Supplement: pone.0218827.s006.pdf [file pone.0218827.s006.pdf]
