# Supplementary material for: γδ T cells shape memory-phenotype αβ T cell populations in non-immunized mice
Source: PubMed Central journal article supplement (PMC6592556; doi:10.1371/journal.pone.0218827), 2019-06-25

**S7 Fig.: Similar effect of  $\gamma\delta$  T cell-deficiencies on total splenic  $\alpha\beta$  T cells in female and male mice**

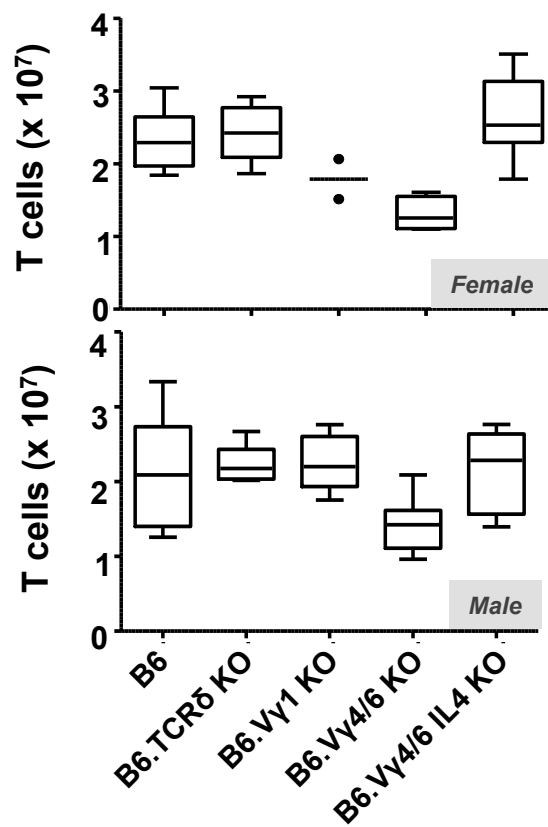

Supplement: pone.0218827.s007.pdf [file pone.0218827.s007.pdf]
