# Supplementary material for: γδ T cells shape memory-phenotype αβ T cell populations in non-immunized mice
Source: PubMed Central journal article supplement (PMC6592556; doi:10.1371/journal.pone.0218827), 2019-06-25

**S8 Fig.: Gating strategy for CD4+ and CD8+ memory-phenotype  $\alpha\beta$  T cells in the spleen of  $\gamma\delta$  T cell deficient mice**

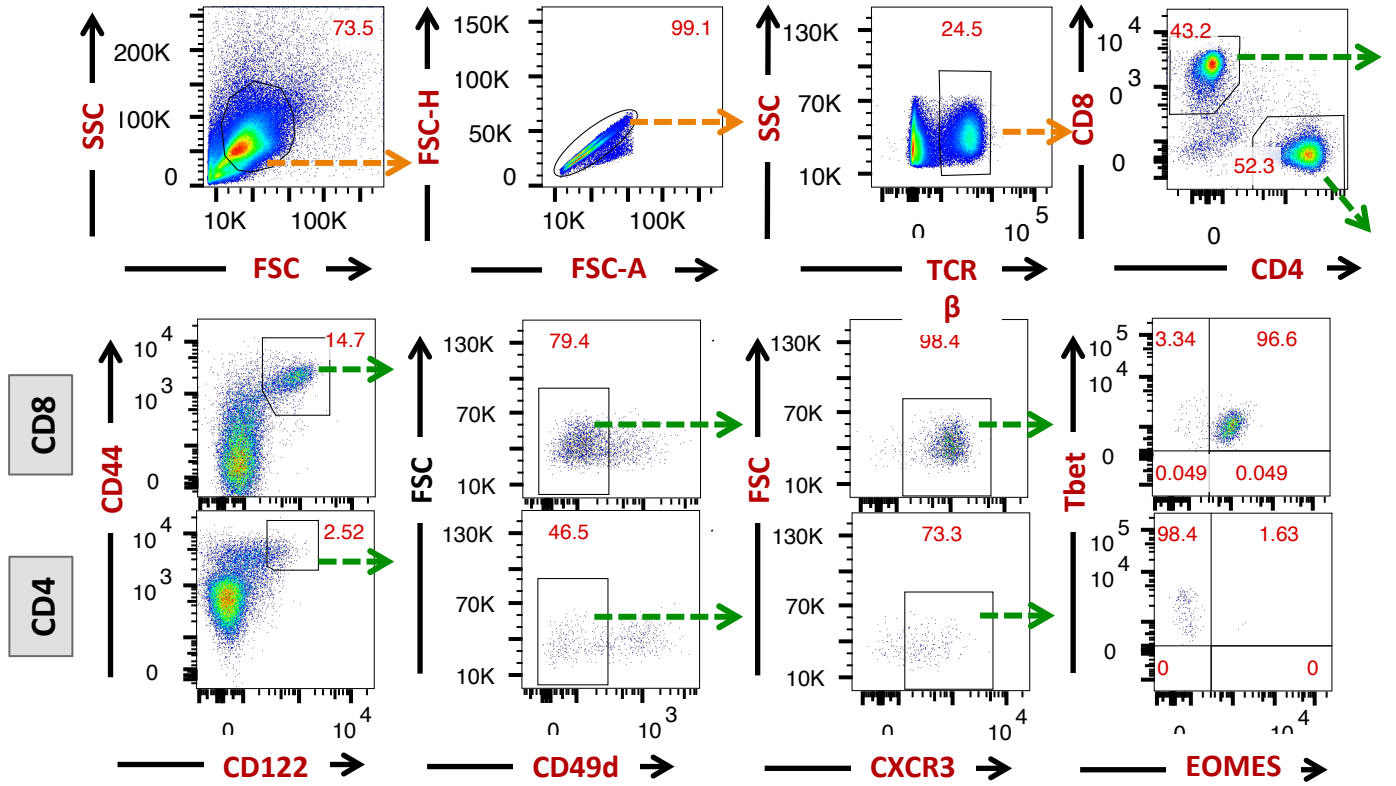

Supplement: pone.0218827.s008.pdf [file pone.0218827.s008.pdf]
