# Supplementary material for: γδ T cells shape memory-phenotype αβ T cell populations in non-immunized mice
Source: PubMed Central journal article supplement (PMC6592556; doi:10.1371/journal.pone.0218827), 2019-06-25

S9 Fig.: IL4R $\alpha$  Expression on CD4 and CD8 T cells

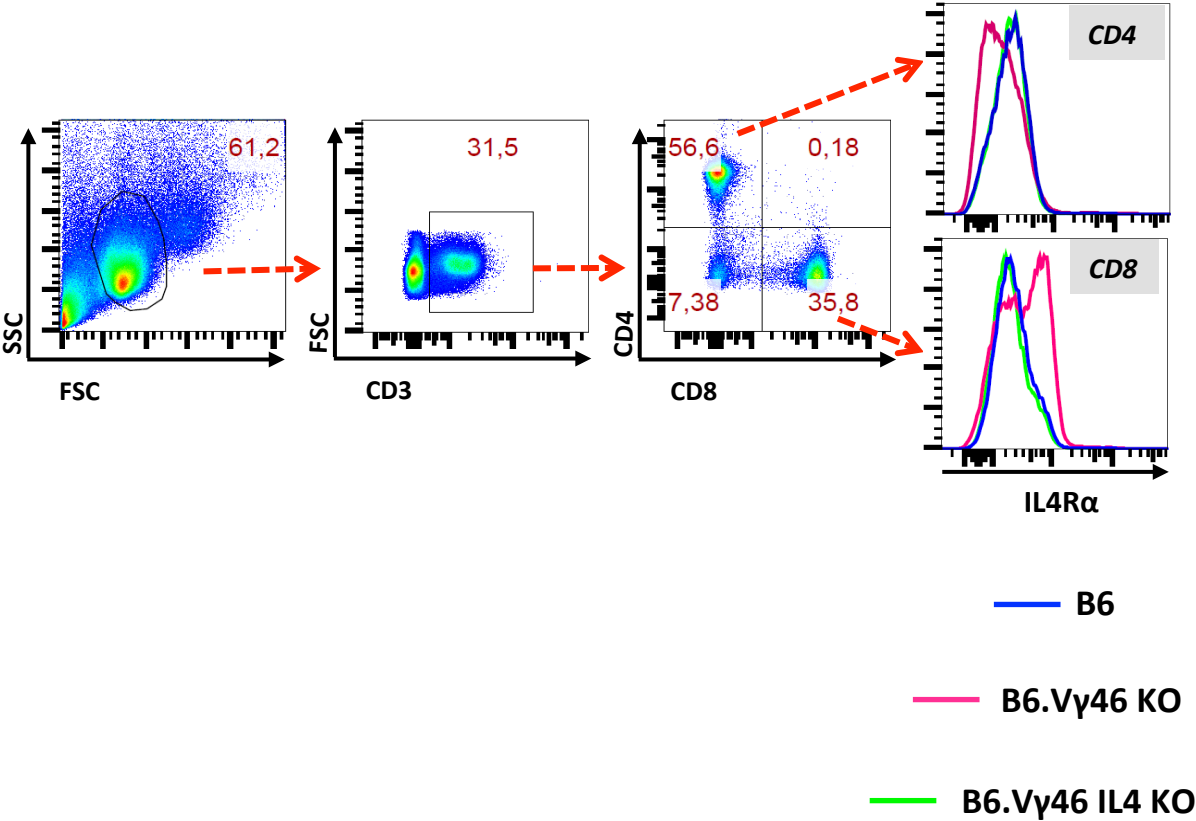

Supplement: pone.0218827.s009.pdf [file pone.0218827.s009.pdf]
