# Supplementary material for: γδ T cells shape memory-phenotype αβ T cell populations in non-immunized mice
Source: PubMed Central journal article supplement (PMC6592556; doi:10.1371/journal.pone.0218827), 2019-06-25

S10 Fig.: CD4+ and CD8+ memory-phenotype  $\alpha\beta$  T cells in the spleen of C57BL/6 (wt), B6.TCR $\delta$ KO and B6.TCR-V $\gamma$ 1KO mice

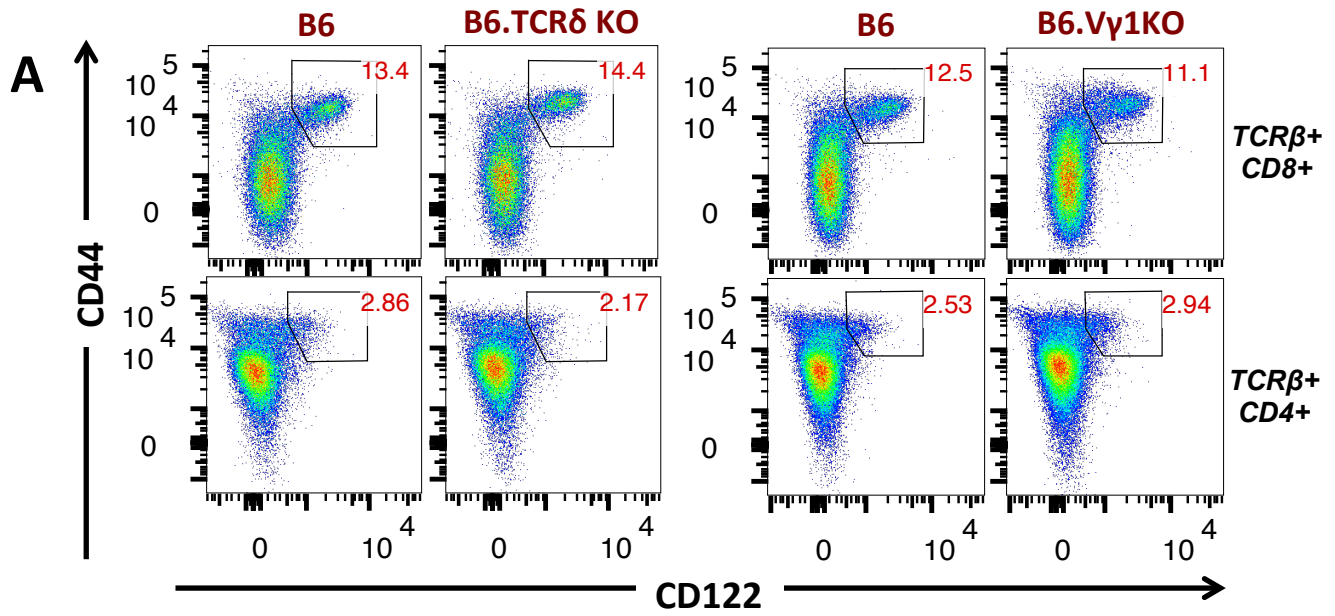

Supplement: pone.0218827.s010.pdf [file pone.0218827.s010.pdf]
