# Supplementary material for: γδ T cells shape memory-phenotype αβ T cell populations in non-immunized mice
Source: PubMed Central journal article supplement (PMC6592556; doi:10.1371/journal.pone.0218827), 2019-06-25
Supplement: pone.0218827.s012.pdf [file pone.0218827.s012.pdf]

## S12 Fig

Relative frequencies of CD4<sup>+</sup>/CD8<sup>+</sup>, CD4<sup>+</sup> and CD8<sup>+</sup> thymocytes in  $\gamma\delta$  T cell-deficient mice

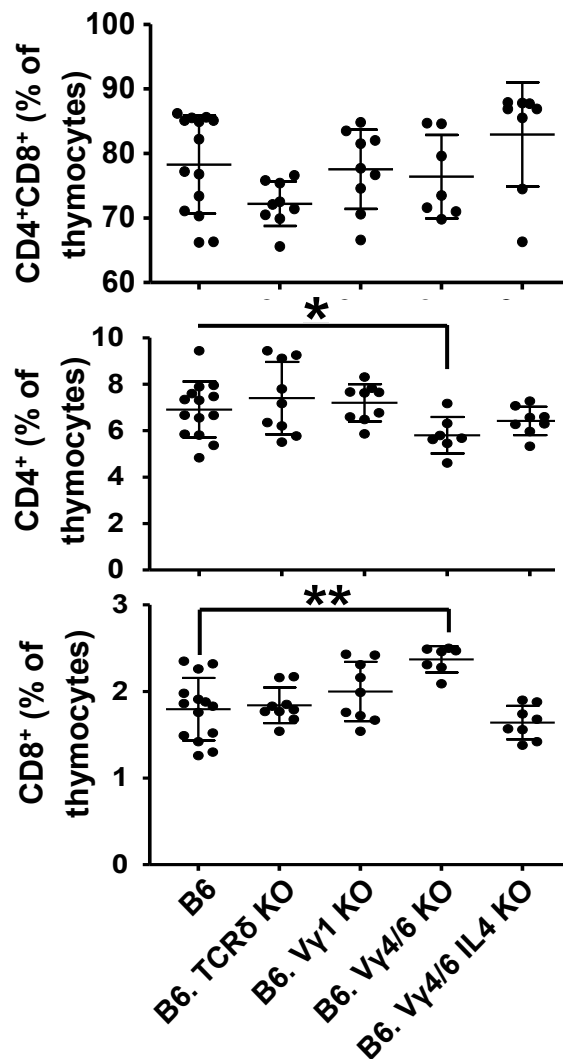

Male and female mice, ages 8-12 wks were included (same mice as in Fig.4). n equal or greater than 7 mice/group. \*p<0.05, \*\*p<0.01
